# Supplementary material for: Transitional States in Ligand-Dependent Transformation of the Aryl Hydrocarbon Receptor into Its DNA-Binding Form
Source: MDPI journal article supplement (doi:10.3390/ijms21072474), 2020-04-02

Supplemental Figure S1. Sequence alignment of the Arg-Cys region of AhRs from diverse species. Conserved Arg residues are indicated in blue and Cys residues in yellow.

| Species     | Protein          | Sequence              |
|-------------|------------------|-----------------------|
|             |                  | * * *                 |
| Mouse (C57) | AhR <sup>b</sup> | NASFMERCFRCRLRCLLDNS  |
| Guinea Pig  | AhR              | NSPLMERCFVCRLRCLLDNS  |
| Rat (RN)    | AhR              | NTAFMERCFRCRLRCLLDNS  |
| Human       | AhR              | NSPLMERCFICRLRCLLDNS  |
| Hamster     | AhR              | SASFLERCFICRLRCLLDNS  |
| Rabbit      | AhR              | NSSFMERCFICRLRCLLDNS  |
| Seal        | AhR              | NSSCMERSFVCRLRCLLDNS  |
| Whale       | AhR              | NSSSMERCFVCRLRCLLDNS  |
| Dolphin     | AhR              | NSSSMERCFVCRLRCLLDNS  |
| -----       |                  |                       |
| Chicken     | AhR              | NSSFMEARNFICRLRCLLDNS |
| Tern        | AhR              | NSSFMEARNFICRLRCLLDNS |
| Trout       | AhR              | NSSFLERNFVCRFRCLLDNS  |
| Fundulus    | AhR1             | NSSFLERNFVCRFRCLLDNS  |
| Fundulus    | AhR2             | SSSFLERSFVCRFRCLLDNS  |
| Zebrafish   | AhR1a            | NSTCLERNFICRLRCLLDST  |
| Zebrafish   | AhR1b            | NSSFLERNFVCRFRCLLDNS  |
| Zebrafish   | AhR2             | NSSFLERSFCCRFRCLLDNS  |
| Tomcod      | AhR              | NSSFLERSFVCRFRCLLDNS  |
| Lamprey     | AhR              | NSSFLERQFICRFRCLLDNS  |

Hsp90 binding to an AhR containing a D371A mutation is similar to that of wild-type (wt) AhR. D371A and wtAhR are indicated with an asterisk. Hsp90 binding to other AhR mutants are also shown, but are not included in this manuscript.

[illegible]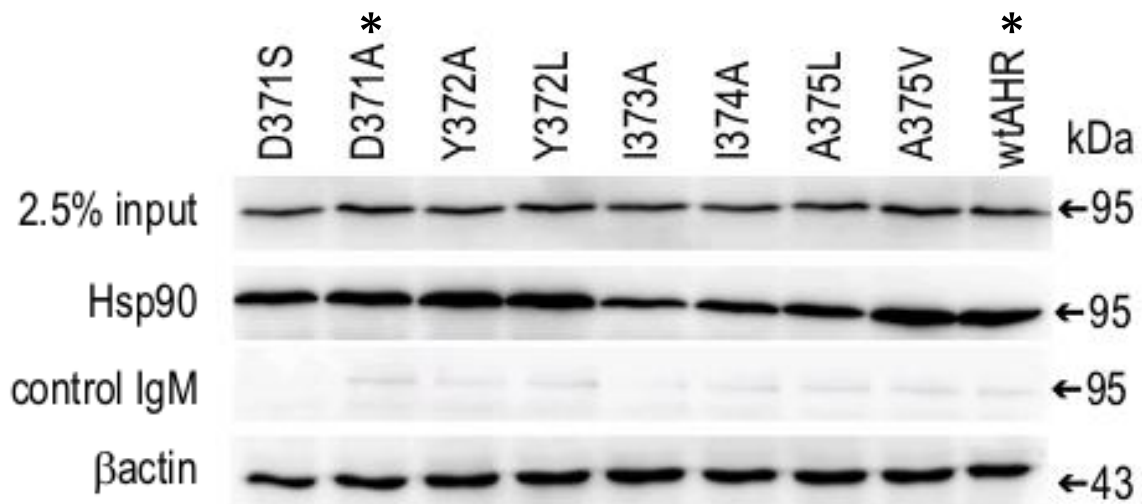

Supplement: s1 [file s1]
